# Supplementary material
Source: ML conference proceedings conference paper supplement (https://openreview.net/forum?id=9dn7CjyTFoS)
Supplement: supplementary_material [file attachment]

First, have a look at these 11 universal patch adversaries.

They are made in the same way as those in the top row of fig. 4. We trained 50 universal adversarial patches with random source/target classes and selected the 11 of them that had average fooling confidences higher than 0.4.

Without knowing them in advance, what do you think the **target** and **disguise** classes might be? Grab a scratch paper and list down some possibilities for each of the 11.

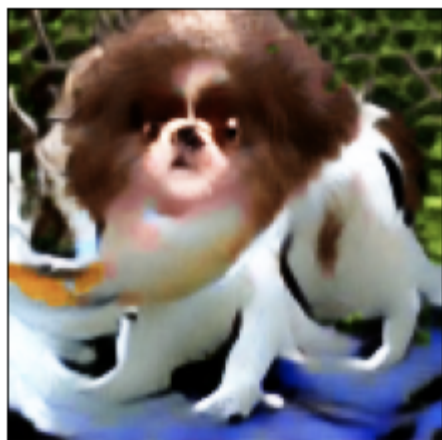

1.

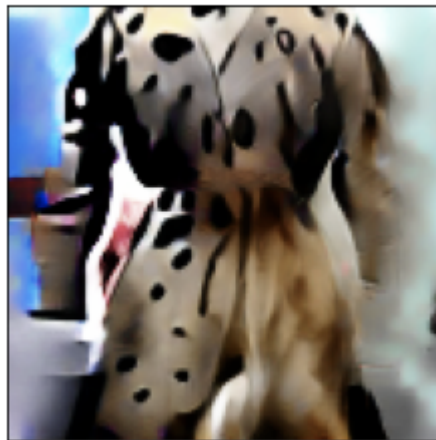

2.

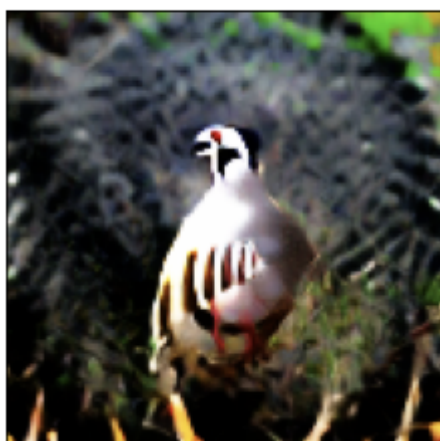

3.

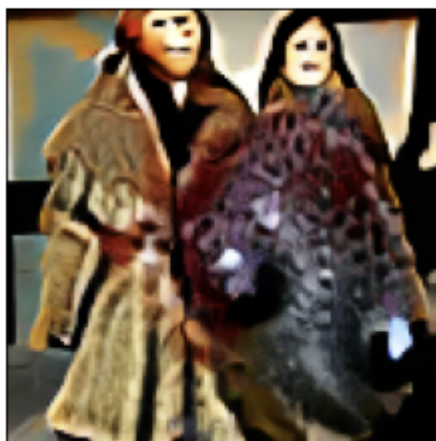

4.

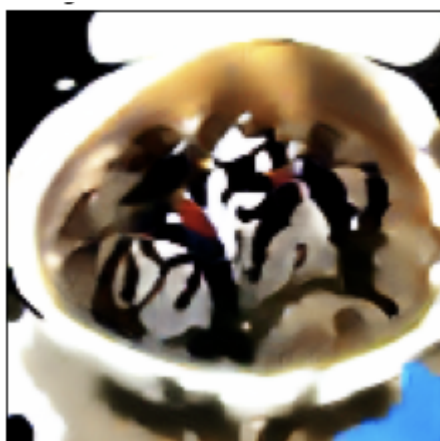

5.

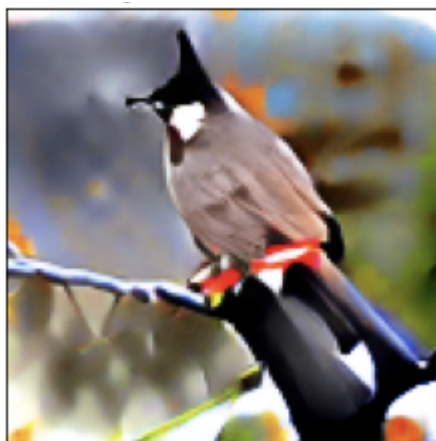

6.

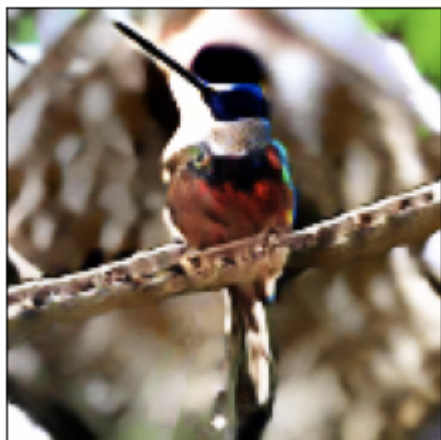

7.

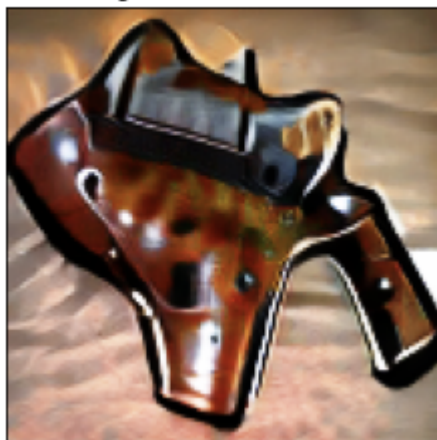

8.

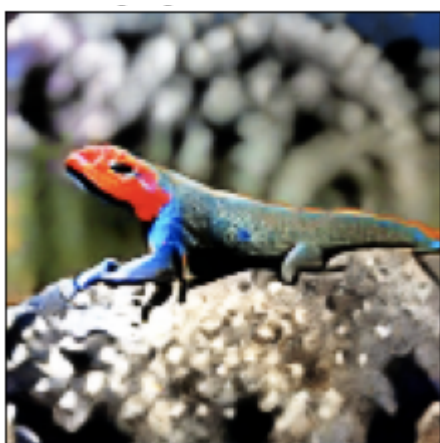

9.

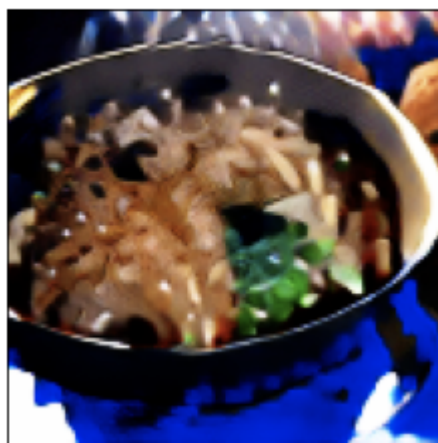

10.

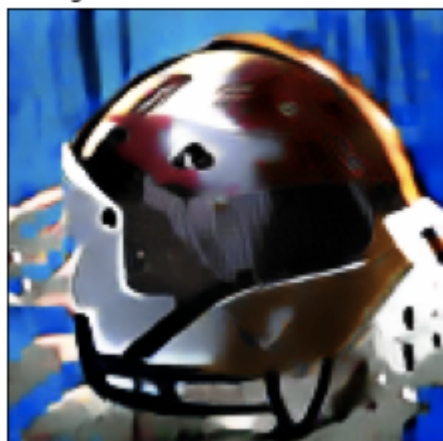

11.

ANSWERS ON NEXT PAGE

How often could you predict the target class versus the disguise class?

“As patch” = target class

“As image” = disguise class

as patch: neck brace, conf: 0.8431  
as img: Japanese spaniel, conf: 0.8109

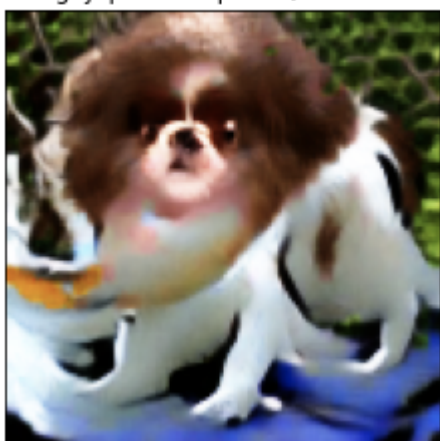

1.

as patch: briard, conf: 0.4933  
as img: dalmatian, conf: 0.9872

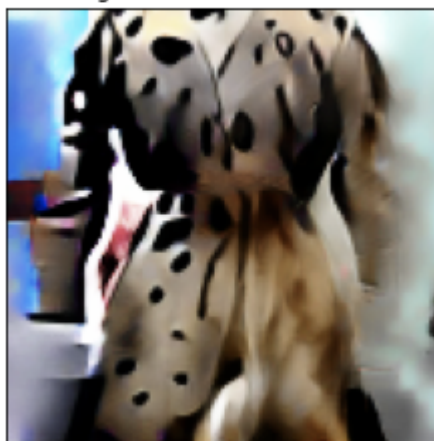

2.

as patch: sloth bear, conf: 0.4404  
as img: partridge, conf: 0.7247

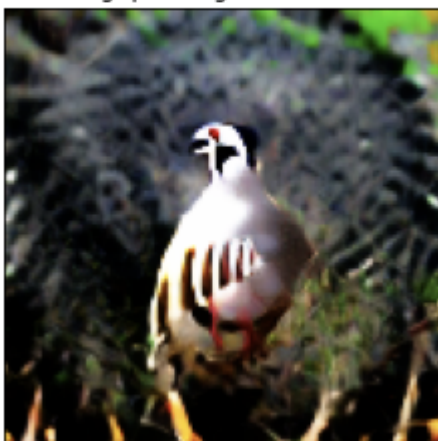

3.

as patch: ant, conf: 0.4273  
as img: fur coat, conf: 0.377

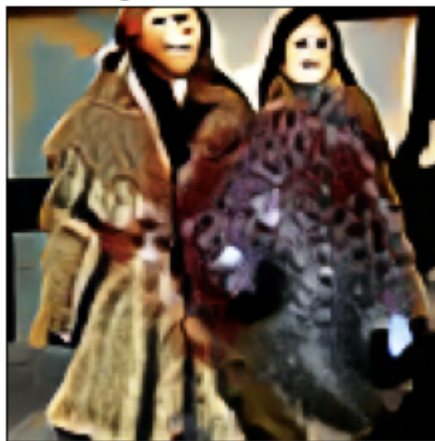

4.



as patch: Pekinese, conf: 0.6999  
as img: chocolate sauce, conf: 0.9543

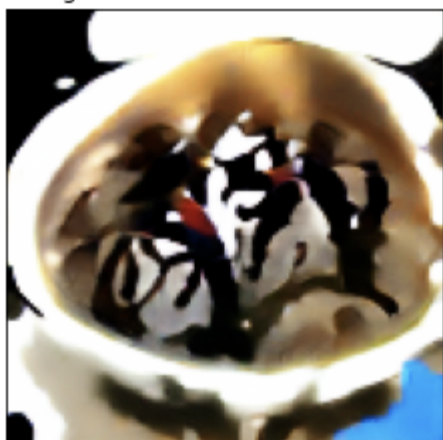

5.

as patch: cleaver, conf: 0.5282  
as img: bulbul, conf: 0.9998

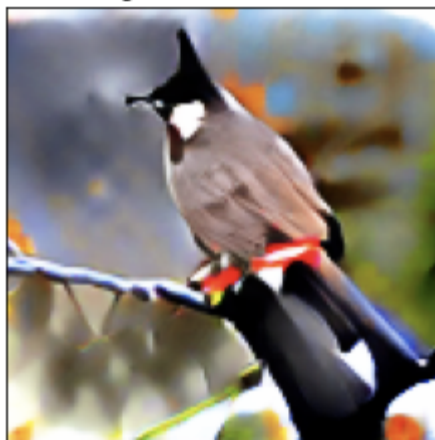

6.

as patch: cocker spaniel, conf: 0.5715  
as img: jacamar, conf: 0.9981

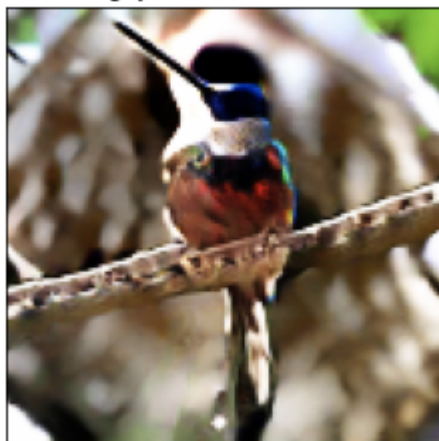

7.

as patch: centipede, conf: 0.6523  
as img: holster, conf: 0.9654

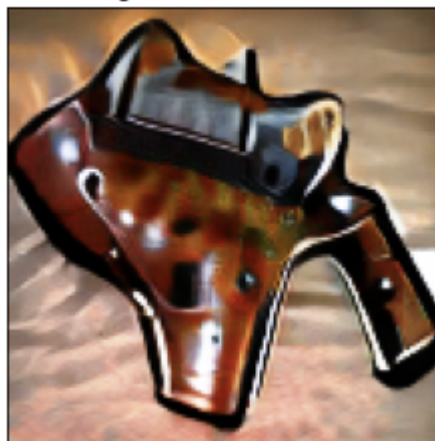

8.

as patch: snow leopard, conf: 0.4404  
as img: agama, conf: 0.9995

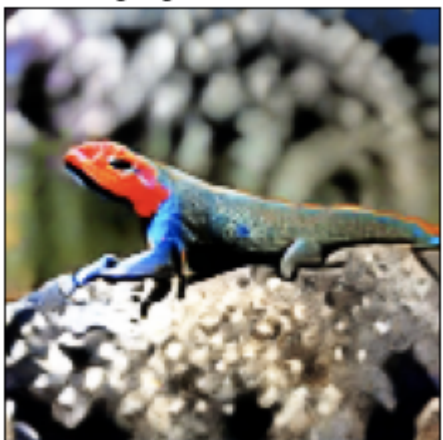

9.

as patch: Airedale, conf: 0.6344  
as img: hot pot, conf: 0.6479

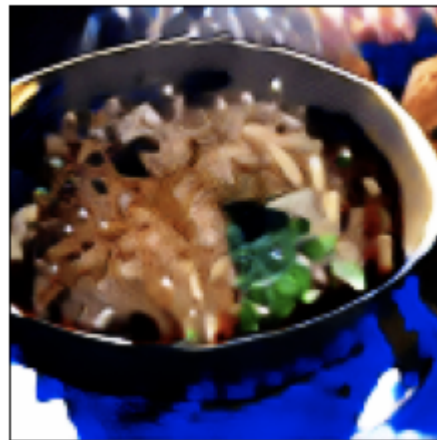

10.

as patch: Brittany spaniel, conf: 0.4546  
as img: football helmet, conf: 0.9999

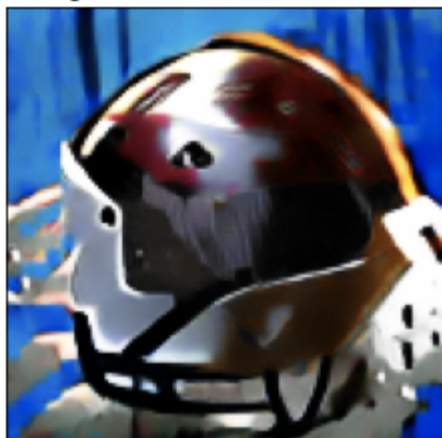

11.
